# Supplementary material for: Yes, You Can? A Speaker’s Potency to Act upon His Words Orchestrates Early Neural Responses to Message-Level Meaning
Source: PubMed Central journal article supplement (PMC3722173; doi:10.1371/journal.pone.0069173), 2013-07-24
Supplement: pone.0069173.s014.pdf [file pone.0069173.s014.pdf]

Table S1: Mean plausibility ratings for the critical sentence materials as determined in a questionnaire pre-test (standard deviations are given in parentheses). Ratings were obtained on a 6-point scale (1 = “highly plausible”, 6 = “completely implausible”). Statistical analysis of the ratings via a repeated measures analysis of variance (ANOVA) revealed a main effect of TRUE-FALSE ( $F(1,39) = 1555.73, p < 0.0001$ ) and interaction of SENTENCE-TYPE x TRUE-FALSE ( $F(1,39) = 142.94, p < 0.0001$ ). (Note that this analysis was performed by-participants only, since items differed across sentence types.) Simple comparisons for each sentence type were performed by-participants ( $F_1$ ) and by-items ( $F_2$ ) and are reported in the table.

| Condition |       | Rating      | Statistical analysis              |
|-----------|-------|-------------|-----------------------------------|
| GENERAL   | true  | 1.40 (0.32) | $F_1(1,39) = 2549.37, p < 0.0001$ |
|           | false | 5.59 (0.39) | $F_2(1,35) = 676.42, p < 0.0001$  |
| POLITICAL | true  | 2.39 (0.59) | $F_1(1,39) = 346.02, p < 0.0001$  |
|           | false | 4.86 (0.64) | $F_2(1,35) = 66.44, p < 0.0001$   |
