# Supplementary material for: Yes, You Can? A Speaker’s Potency to Act upon His Words Orchestrates Early Neural Responses to Message-Level Meaning
Source: PubMed Central journal article supplement (PMC3722173; doi:10.1371/journal.pone.0069173), 2013-07-24
Supplement: pone.0069173.s015.pdf [file pone.0069173.s015.pdf]

Table S2: Parameter values for the fixed effects in the linear mixed effects model for the first N400 time window (150-300 ms). The model was fit using a maximal random effects structure and a minimal adequate fixed effects structure (see the main text for details). For reasons of readability, only effects approaching significance ( $|t| > 1.9$ ) are reported. In addition, in view of the research questions pursued here, we only report effects of or interactions including TRUE-FALSE. Note that the reference levels for the fixed factors were as follows: TRUE-FALSE: false; SENTENCE-TYPE: general; SPEAKER: control; GROUP: Experiment 1; ROI: left-anterior.

| <b>Effect</b>                                                    | <b>Estimate</b> | <b>Standard error</b> | <b>t-value</b> |
|------------------------------------------------------------------|-----------------|-----------------------|----------------|
| Intercept                                                        | -1.27           | 0.31                  | -4.07          |
| TRUE-FALSE(true)                                                 | 0.88            | 0.40                  | 2.21           |
| GROUP(exp2):TRUE-FALSE(true)                                     | -0.96           | 0.44                  | -2.16          |
| TRUE-FALSE(true):SPEAKER(prominent): ROI(l-post)                 | 0.80            | 0.35                  | 2.40           |
| TRUE-FALSE(true):SPEAKER(prominent): ROI(r-post)                 | 0.77            | 0.34                  | 2.28           |
| GROUP(exp2):SPEAKER(prominent):TRUE-FALSE(true)                  | 1.22            | 0.30                  | 4.00           |
| TRUE-FALSE(true):TYPE(political): ROI(l-post)                    | -0.90           | 0.34                  | -2.62          |
| GROUP(exp2):SPEAKER(prominent):TRUE-FALSE(true): ROI(l-post)     | -1.14           | 0.40                  | -2.87          |
| GROUP(exp2):SPEAKER(prominent):TRUE-FALSE(true): ROI(r-post)     | -1.27           | 0.39                  | -3.19          |
| GROUP(exp2):TYPE(political):TRUE-FALSE(true): ROI(l-post)        | 1.07            | 0.40                  | 2.70           |
| GROUP(exp2):SPEAKER(prominent):TYPE(political): TRUE-FALSE(true) | -0.88           | 0.23                  | -3.83          |
