# Supplementary material for: Yes, You Can? A Speaker’s Potency to Act upon His Words Orchestrates Early Neural Responses to Message-Level Meaning
Source: PubMed Central journal article supplement (PMC3722173; doi:10.1371/journal.pone.0069173), 2013-07-24
Supplement: pone.0069173.s016.pdf [file pone.0069173.s016.pdf]

Table S3: Parameter values for the fixed effects in the linear mixed effects model for the second N400 time window (300-450 ms). The model was fit using a maximal random effects structure and a minimal adequate fixed effects structure (see the main text for details). For reasons of readability, only effects approaching significance ( $|t| > 1.9$ ) are reported. In addition, in view of the research questions pursued here, we only report effects of or interactions including TRUE-FALSE. Note that the reference levels for the fixed factors were as follows: TRUE-FALSE: false; SENTENCE-TYPE: general; SPEAKER: control; GROUP: Experiment 1; ROI: left-anterior.

| <b>Effect</b>                                                    | <b>Estimate</b> | <b>Standard error</b> | <b>t-value</b> |
|------------------------------------------------------------------|-----------------|-----------------------|----------------|
| Intercept                                                        | -0.90           | 0.37                  | -2.43          |
| TRUE-FALSE(true):ROI(l-cent)                                     | 0.68            | 0.26                  | 2.60           |
| TRUE-FALSE(true):ROI(l-post)                                     | 0.99            | 0.26                  | 3.80           |
| TRUE-FALSE(true):ROI(r-ant)                                      | 0.64            | 0.26                  | 2.45           |
| TRUE-FALSE(true):ROI(r-cent)                                     | 1.07            | 0.26                  | 4.10           |
| TRUE-FALSE(true):ROI(r-post)                                     | 0.92            | 0.26                  | 3.53           |
| TRUE-FALSE(true):TYPE(political): ROI(l-cent)                    | -0.78           | 0.34                  | -2.27          |
| TRUE-FALSE(true):TYPE(political): ROI(l-post)                    | -1.16           | 0.34                  | -3.37          |
| TRUE-FALSE(true):TYPE(political): ROI(r-cent)                    | -0.90           | 0.34                  | -2.61          |
| TRUE-FALSE(true):TYPE(political): ROI(r-post)                    | -0.94           | 0.34                  | -2.73          |
| TRUE-FALSE(true):GROUP(exp2):TYPE(political): ROI(r-post)        | 0.94            | 0.40                  | 2.36           |
| TRUE-FALSE(true):SPEAKER(prominent):TYPE(political): ROI(r-post) | -1.14           | 0.40                  | -2.86          |
| GROUP(exp2):SPEAKER(prominent):TYPE(political): TRUE-FALSE(true) | -0.75           | 0.23                  | -3.22          |
