# Supplementary material for: Yes, You Can? A Speaker’s Potency to Act upon His Words Orchestrates Early Neural Responses to Message-Level Meaning
Source: PubMed Central journal article supplement (PMC3722173; doi:10.1371/journal.pone.0069173), 2013-07-24
Supplement: pone.0069173.s017.pdf [file pone.0069173.s017.pdf]

Table S4: Parameter values for the fixed effects in the linear mixed effects model for the first late positivity time window (600-750 ms). The model was fit using a maximal random effects structure and a minimal adequate fixed effects structure (see the main text for details). For reasons of readability, only effects approaching significance ( $|t| > 1.9$ ) are reported. In addition, in view of the research questions pursued here, we only report effects of or interactions including TRUE-FALSE. Note that the reference levels for the fixed factors were as follows: TRUE-FALSE: false; SENTENCE-TYPE: general; SPEAKER: control; GROUP: Experiment 1; ROI: left-anterior.

| <b>Effect</b>                                   | <b>Estimate</b> | <b>Standard error</b> | <b>t-value</b> |
|-------------------------------------------------|-----------------|-----------------------|----------------|
| Intercept                                       | 0.84            | 0.41                  | 2.04           |
| TRUE-FALSE(true)                                | -1.04           | 0.45                  | -2.29          |
| TRUE-FALSE(true):ROI(l-cent)                    | -0.97           | 0.21                  | -4.73          |
| TRUE-FALSE(true):ROI(l-post)                    | -1.54           | 0.21                  | -7.49          |
| TRUE-FALSE(true):ROI(r-cent)                    | -0.58           | 0.21                  | -4.73          |
| TRUE-FALSE(true):ROI(r-post)                    | -1.29           | 0.21                  | -6.27          |
| TRUE-FALSE(true):SPEAKER(prominent)             | 1.08            | 0.35                  | 3.08           |
| TRUE-FALSE(true):SPEAKER(prominent):ROI(l-post) | -0.51           | 0.21                  | -2.49          |
| TRUE-FALSE(true):SPEAKER(prominent):ROI(l-post) | -0.60           | 0.21                  | -2.92          |
| TRUE-FALSE(true):GROUP(exp2):SPEAKER(prominent) | -0.65           | 0.12                  | -5.45          |
| TRUE-FALSE(true):TYPE(political): ROI(l-cent)   | 0.75            | 0.21                  | 3.63           |
| TRUE-FALSE(true):TYPE(political): ROI(l-post)   | 1.59            | 0.21                  | 7.71           |
| TRUE-FALSE(true):TYPE(political): ROI(r-cent)   | 0.64            | 0.21                  | 3.13           |
| TRUE-FALSE(true):TYPE(political): ROI(r-post)   | 1.54            | 0.21                  | 7.47           |
