# Supplementary material for: Yes, You Can? A Speaker’s Potency to Act upon His Words Orchestrates Early Neural Responses to Message-Level Meaning
Source: PubMed Central journal article supplement (PMC3722173; doi:10.1371/journal.pone.0069173), 2013-07-24
Supplement: pone.0069173.s019.pdf [file pone.0069173.s019.pdf]

## **Additional sentence examples for each of the critical sentence conditions**

Examples are accompanied by a literal (word-by-word) translation. A full list of materials can be obtained from the corresponding author upon request.

### **POLITICAL - TRUE**

Die Bundesregierung fördert in Ostdeutschland zukunftsorientierte Forschungsprojekte.  
*the Federal Government supports in East Germany future-oriented research projects*

Das statistische Bundesamt meldet für das erste Quartal 2007 ein 1.5 prozentiges Wirtschaftswachstum.  
*the Federal Statistics Office announces for the first quarter 2007 a 1.5 percent economic growth*

Das Bundesamt für Verfassungsschutz schafft ein Aussteigerprogramm für Rechtsextremisten.  
*the Federal Office for the Protection of the Constitution is creating an exit programme for right-wing extremists*

Das Ministerium für Ernährung erarbeitet neue Standards für die Schulspeisung.  
*the Ministry of Food is developing new standards for school meals*

Ein großes Thema des Außenministeriums bleibt die Bekämpfung des Terrorismus.  
*a big topic of the Foreign Ministry remains the fight against terrorism*

### **POLITICAL - FALSE**

Das Bundesforschungsministerium verbietet alle deutschen Forschungsprojekte.  
*the Federal Ministry of Science prohibits all German research projects*

Die Bundesregierung zielt in der Zukunft auf eine Volkswirtschaft ohne Wirtschaftswachstum.  
*the Federal Government aims in the future for an economy without economic growth*

Das Bundespresseamt berät die junge Führungselite der Rechtsextremisten  
*the Federal Press Office advises the young leadership of the right-wing extremists*

Das Bildungsministerium bewilligt genmanipulierte Lebensmittel für die Schulspeisung  
*the Ministry of Education approves genetically manipulated food for school meals*

Die Bundesregierung fördert in Sachsen den radikalen Terrorismus  
*the Federal Government supports in Saxony radical terrorism*

### **GENERAL - TRUE**

Minnie ist die Freundin von Micky Maus.  
*Minnie is the girlfriend of Micky Mouse*

Peking ist die Hauptstadt von China.  
*Beijing is the capital of China*

Theologie ist die Lehre von den Religionen.  
*theology is the study of the religions*

Die Cheops-Pyramide findet man in Ägypten.  
*the Pyramid of Cheops finds one in Egypt*

Der Louvre in Paris dient der Präsentation von Gemälden.  
*the Louvre in Paris serves the presentation of paintings*
